# Supplementary material for: The Short-Term Opening of Cyclosporin A-Independent Palmitate/Sr2+-Induced Pore Can Underlie Ion Efflux in the Oscillatory Mode of Functioning of Rat Liver Mitochondria
Source: MDPI journal article supplement (doi:10.3390/membranes12070667), 2022-06-28
Supplement: s1 [file s1]

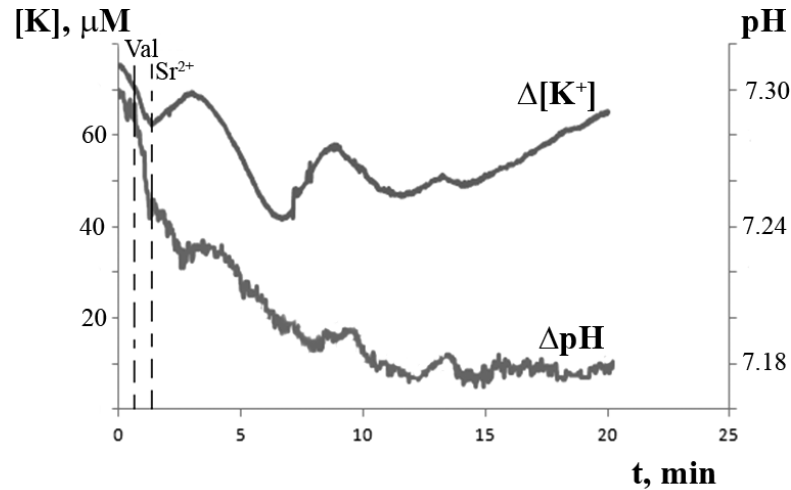

**Figure S1.** Simultaneous recording of  $\text{Sr}^{2+}$ /valinomycin-induced oscillations in  $\text{K}^+$  fluxes and external pH in the suspension of rat liver mitochondria. The medium contained 20 mM sucrose, 1 mM KCl, 1  $\mu\text{M}$  CsA, 1  $\mu\text{M}$  rotenone, 5 mM succinic acid, 12.5 mM Tris (pH 7.3). Additions: 2 ng valinomycin and 45 nmol  $\text{SrCl}_2/\text{mg}$  of protein. Changes in the concentrations of  $\text{K}^+$  and  $\text{H}^+$  were recorded simultaneously in a 1-ml temperature-controlled cell with constant stirring at 26 C using ion-selective electrodes. The typical traces are presented ( $n = 5$ ).

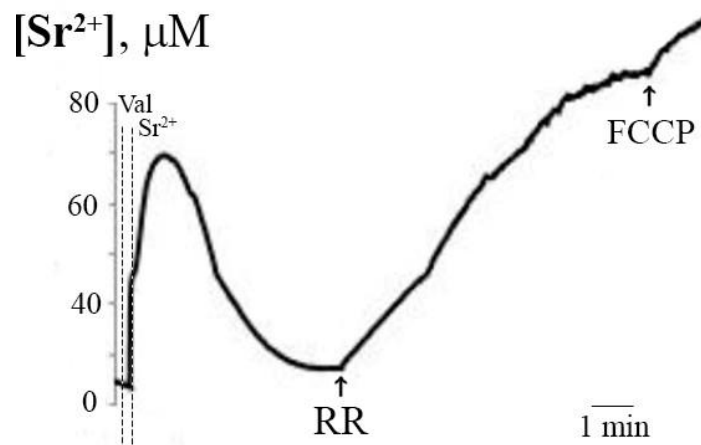

**Figure S2.** Ruthenium red (RR, 1  $\mu\text{M}$ ) prevents the extension of the  $\text{Sr}^{2+}$ /valinomycin-induced cyclic changes in strontium ion fluxes in rat liver mitochondria. The medium and experimental conditions were the same as in Figure S1. Additions: 2 ng valinomycin and 45 nmol  $\text{SrCl}_2/\text{mg}$  of protein. The concentrations of  $\text{Sr}^{2+}$  ions in the incubation medium were determined with an ion-selective electrode and an electrometrical system Record 4 (Russia). The typical traces are presented ( $n = 5$ ).

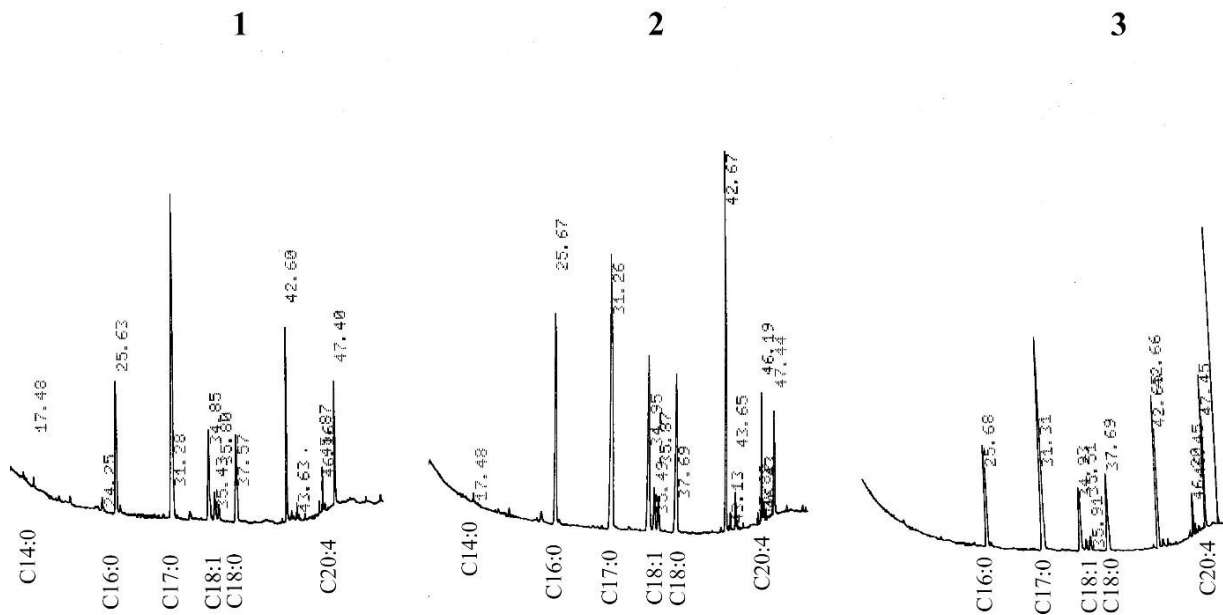

**Figure S3.** Gas-liquid chromatography profile of FFA methyl esters obtained from rat liver mitochondria before (control, 1) and after the onset of  $\text{Sr}^{2+}$ /valinomycin-induced ion oscillations in the absence (0.1% DMSO) (2) or presence of 25  $\mu\text{M}$  aristolochic acid (ArA), a phospholipase A<sub>2</sub> inhibitor (3). Chromatograms were obtained on a glass open tubular column packed with Porapak Q (2mm i.d. x 1m) installed in a Pye-Unicam Model 304 gas chromatograph as described in the Material and Methods section. The typical chromatograms are presented ( $n = 4$ ).

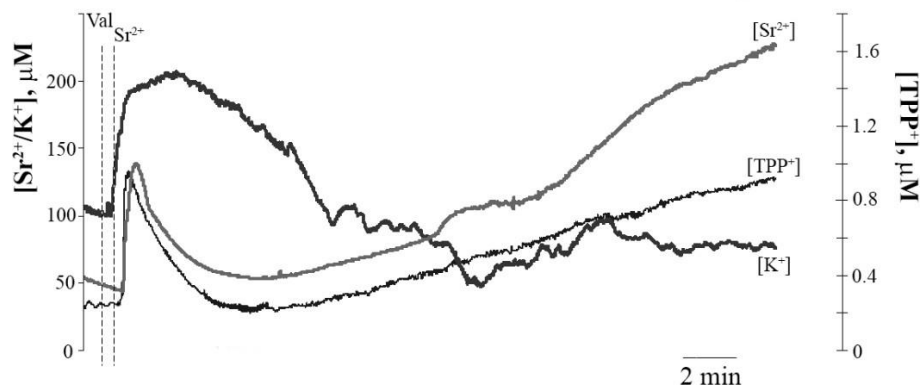

**Figure S4.** Blocking effect of AACOCF<sub>3</sub> (15  $\mu\text{M}$ ), a  $\text{Ca}^{2+}$ -dependent phospholipase A<sub>2</sub> inhibitor, on  $\text{Sr}^{2+}$ /valinomycin-induced cyclic changes in the fluxes of  $\text{Sr}^{2+}$ ,  $\text{K}^+$ , and  $\text{TPP}^+$  in rat liver mitochondria. The medium and conditions were the same as in Figure S1. Changes in the concentrations of  $\text{Sr}^{2+}$ ,  $\text{K}^+$ , and  $\text{TPP}^+$  ions were recorded simultaneously in a 1-ml temperature-controlled cell using an original multichannel electrometrical system Record 4 (Russia) and ion-sensitive electrodes. Additions: 2 ng valinomycin and 45 nmol  $\text{SrCl}_2$ /mg of protein. The PLA<sub>2</sub> inhibitor were added to the mitochondria 1 min before the addition of  $\text{Sr}^{2+}$ . The typical traces are presented ( $n = 5$ ).

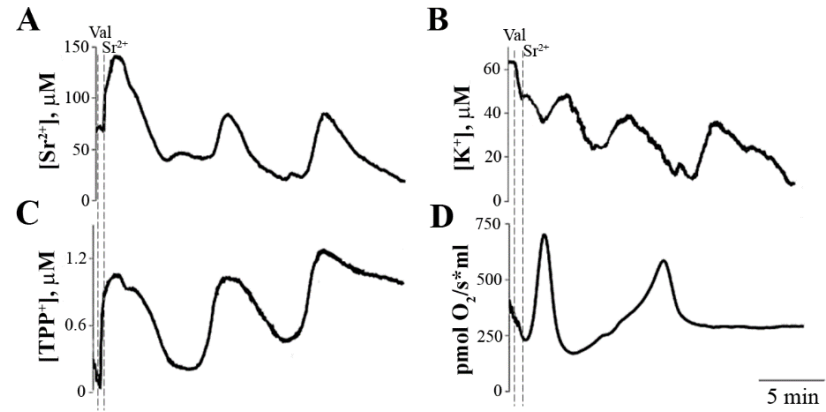

**Figure S5.** The  $\text{Ca}^{2+}$ -independent phospholipase  $\text{A}_2$  inhibitor PACOCF<sub>3</sub> (20  $\mu\text{M}$ ) has no effect on  $\text{Sr}^{2+}$ /valinomycin-induced cyclic changes in the fluxes of  $\text{Sr}^{2+}$  (A),  $\text{K}^+$  (B),  $\text{TPP}^+$  (C), and the respiration rate (D) of rat liver mitochondria. The medium and conditions were the same as in Figure S1. Additions: 2 ng valinomycin and 45 nmol  $\text{SrCl}_2/\text{mg}$  of protein. The  $\text{PLA}_2$  inhibitor was added to the mitochondria 1 min before the addition of  $\text{Sr}^{2+}$ . The typical traces are presented ( $n = 5$ ).

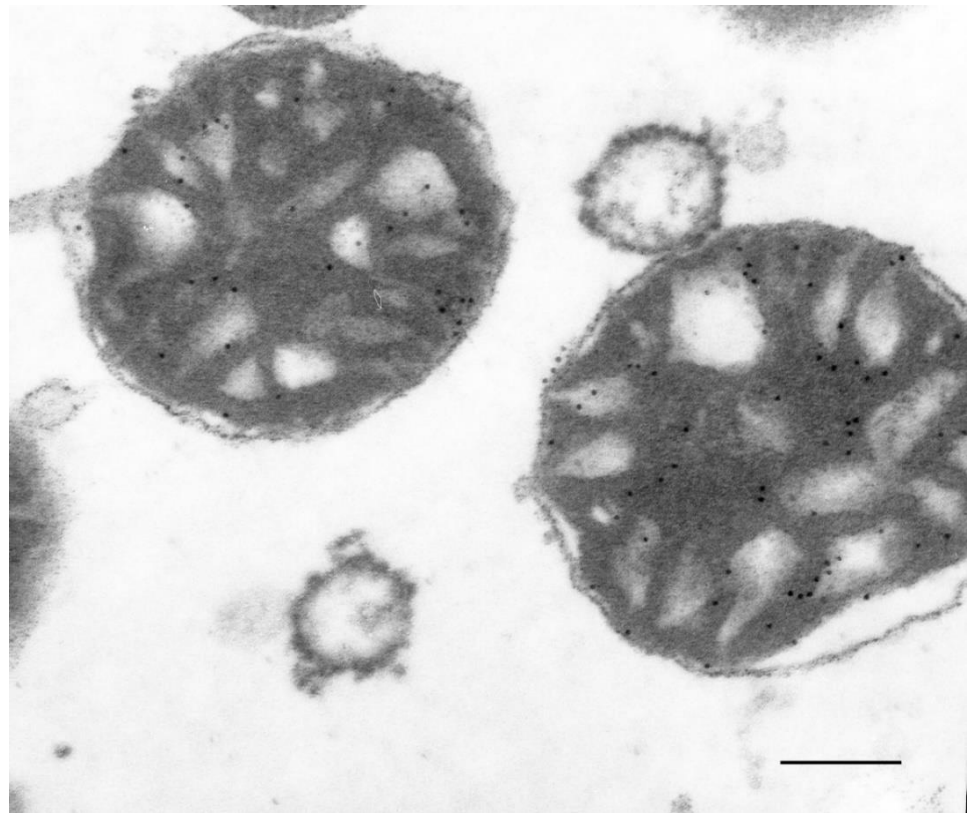

(a)

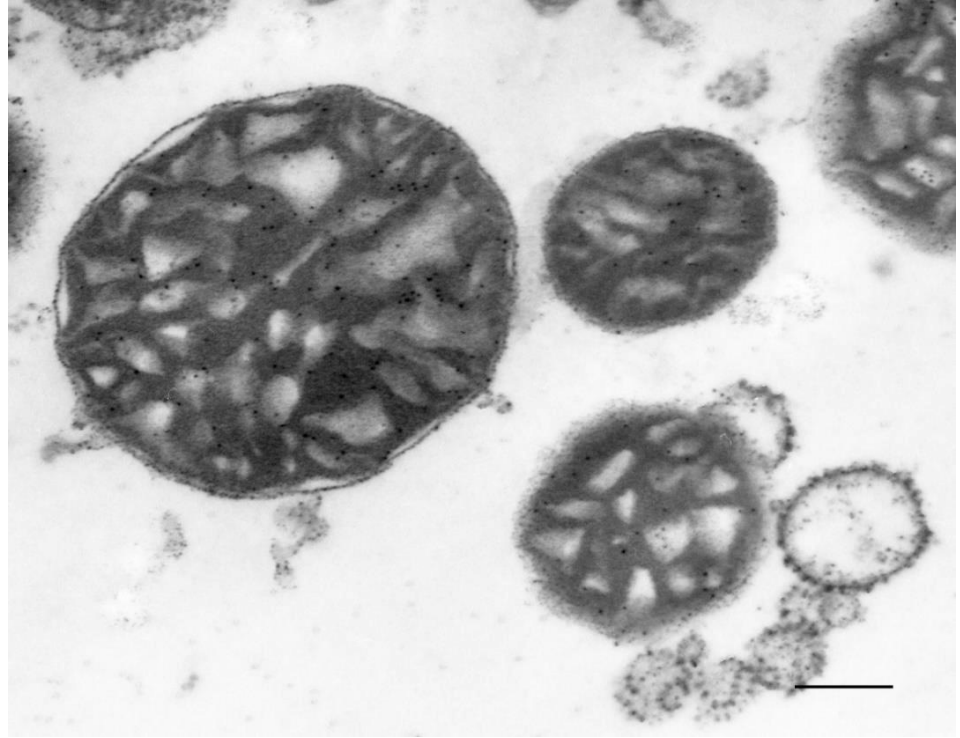

(b)

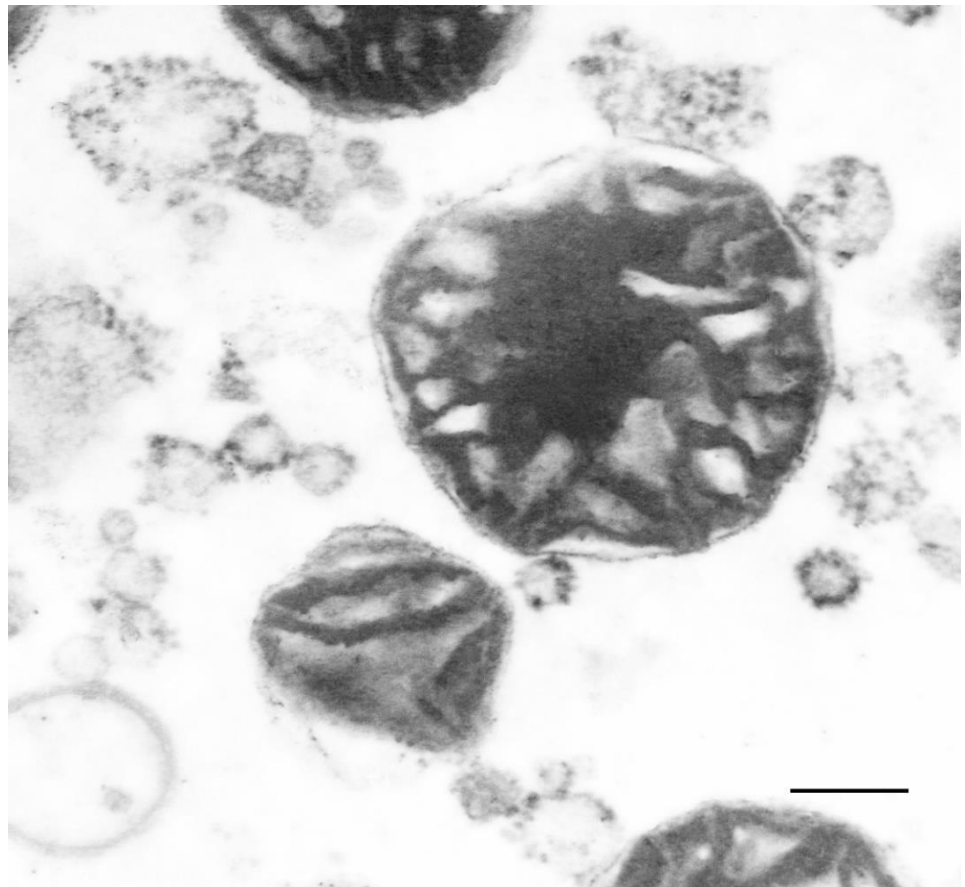

(c)

**Figure S6.** Typical immunoelectron micrographs of isolated rat liver mitochondria treated with antibodies against the group IV cytosolic phospholipase A2 (a, b) or 0.1 M PBS buffer (c) in the

presence of 10-nm colloidal gold labeled antibodies: **(a, b)** Mitochondria were incubated with specific antibodies against the group IV  $\text{Ca}^{2+}/\text{Sr}^{2+}$ -dependent cPLA2 (Santa Cruz Biotechnology, USA) and secondary antibodies labeled with colloidal gold with a particle size of 10 nm (Sigma-Aldrich, St. Louis, MO, USA). Black granules are the binding sites for the antibodies and the protein; **(c)** Control; mitochondria were incubated in 0.1 M PBS buffer instead of anti-cPLA2 antibody. Scale bar, 0.25  $\mu\text{m}$ .
